1 **Detecting telomere elongation in longitudinal datasets: Analysis of a proposal by Simons, Stulp**  
2 **and Nakagawa**

3

4 Daniel Nettle & Melissa Bateson<sup>1</sup>

5 *Centre for Behaviour and Evolution & Institute of Neuroscience, Newcastle University, Newcastle*  
6 *upon Tyne, UK.*

7

8

9

10

**Abstract**

11 Telomere shortening has emerged as an important biomarker of aging. Longitudinal studies  
12 consistently find that, although telomere length shortens over time on average, there is a subset of  
13 individuals for whom telomere length is observed to increase. This apparent lengthening could  
14 either be a genuine biological phenomenon, or simply due to measurement and sampling error.  
15 Simons, Stulp and Nakagawa [*Biogerontology* 15: 99-103, 2014] recently proposed a statistical test  
16 for detecting when the amount of apparent lengthening in a dataset exceeds that which should be  
17 expected due to error, and thus indicating that genuine elongation may be operative in some  
18 individuals. The test is however based on a restrictive assumption, namely that each individual's true  
19 rate of telomere change is constant over time. It is not currently known whether this assumption is  
20 true. Here we show, using simulated datasets, that with perfect measurement and large sample size,  
21 the test has high power to detect true lengthening as long as the true rate of shortening is either  
22 constant, or moderately stable, over time. If the true rate of lengthening varies randomly from year  
23 to year, the test systematically returns type-II errors. We also consider the impact of measurement  
24 error. Using estimates of the magnitude of annual attrition and of measurement error derived from  
25 the human telomere literature, we show that power of the test is likely to be low in several  
26 empirically-realistic scenarios, even in large samples. Thus, whilst a significant result of the proposed  
27 test is likely to indicate that true lengthening is present in a data set, type-II errors are a likely  
28 outcome, either if measurement error is substantial, and/or the true rate of attrition varies  
29 substantially over time within individuals.

30

31 **Keywords:** telomere length; biomarkers; statistics; telomere lengthening; aging

32

---

<sup>1</sup> The authors contributed equally to this paper. Correspondence should be addressed to:  
[daniel.nettle@ncl.ac.uk](mailto:daniel.nettle@ncl.ac.uk). The research was supported by the National Centre for the Replacement  
Refinement and Reduction of Animals in Research (NC3Rs) under grant number NC/K000801/1 and  
the European Research Council (ERC) under grant number AdG 666669 (COMSTAR).

### 33 Introduction

34 Telomere shortening in tissues such as blood has emerged as an important biomarker of ageing  
35 (Müezziner, Karina & Brenner, 2013), predictor of future morbidity and mortality (Heidinger et al.,  
36 2012; Boonekamp et al., 2013; Rode, Nordestgaard & Bojesen, 2015), and indicator of accumulated  
37 adversity (Hau et al., 2015; Bateson, 2016). Telomeres are repetitive DNA sequences at the end of  
38 eukaryotic chromosomes that, on average at the population level, shorten with age. In longitudinal  
39 studies, though, there is often a substantial fraction of the sample that shows an increase in  
40 measured telomere length (Steenstrup et al., 2013b; Simons, Stulp & Nakagawa, 2014). The  
41 observation of apparent lengthening is potentially important, since it points to the possibility that a  
42 marker of cellular ageing might under some circumstances be reversible *in vivo*. However, telomere  
43 length cannot be measured with perfect precision. There is error variation both due to sampling  
44 (heterogeneity in cells within an individual lead to variable estimates of that individual's average  
45 telomere length), and measurement (laboratory assays do not produce identical results each time  
46 even with the same sample). The existence of error variation means that the second of two  
47 longitudinal samples may show a higher value than the first even if the true average telomere length  
48 has not increased. Thus, it is possible that apparent telomere lengthening in a sample represents no  
49 more than error (Steenstrup et al., 2013b; Bateson & Nettle, 2017).

50 Simons, Stulp and Nakagawa (Simons, Stulp & Nakagawa, 2014; henceforth, SSN) recently proposed  
51 a statistical test for detecting when there is more observed lengthening in a longitudinal sample than  
52 should be expected under the hypothesis of error alone, and hence for inferring when true  
53 lengthening is likely to be present in some subset of the sample. This is potentially a useful  
54 innovation as it might allow resolution of whether apparent telomere lengthening over time *in vivo*  
55 is a biologically real phenomenon or not. The test requires that each individual is measured at three  
56 or more time points. To complete the test, a ratio of two variance estimators (henceforth, the F-  
57 ratio) is compared to an F-distribution, in a similar manner to the F-test familiar from ANOVA. Under  
58 the null hypothesis (no true lengthening), the two estimators will be similar, the F-ratio will be close  
59 to 1, and the  $p$ -value from comparing the statistic to the F-distribution with appropriate degrees of  
60 freedom will be large (i.e. not significant). Under the alternative hypothesis (true lengthening is  
61 present), the numerator will be substantially larger than the denominator, the F-ratio will be larger  
62 than 1, and the  $p$ -value will therefore be small (considered significant by the usual convention when  
63  $p < 0.05$ ).

64 The numerator of the F-ratio estimates the variability in the sample by a calculation based on the  
65 number of individuals who have a higher measured telomere length at the final time point  
66 compared to the first, and the magnitude of their apparent increase (SSN, equation 5; see SSN,  
67 Appendix for derivation of this estimator). The denominator of the F-ratio estimates what under the  
68 null hypothesis is the same variability, in a different way. It fits a separate regression line through  
69 the points corresponding to the repeat measurements of each individual (so the number of  
70 regression lines is equal to the number of individuals in the sample). For each of these lines, it  
71 calculates the variance of the residuals, the deviations of the points from the fitted line. This is why  
72 three measurement points are required: with just two points, the line goes through both and there  
73 is no residual. Finally, the variability of the whole sample is estimated as the mean of the residual  
74 variance from each of the separate individual regressions (see SSN, equations 1-3).

75 There is an important assumption involved in the specification of the denominator of the F-ratio  
76 statistic, namely that each individual's telomeres truly change at a constant rate over time. Thus, any  
77 deviation of the individual's successive measurement points from a straight line (either going up,  
78 going down, or flat) can be taken to represent sampling or measurement error. However, it is not

79 currently known whether this assumption is empirically plausible or not. The pace of telomere  
80 shortening has been linked to infection (Asghar et al., 2015), adverse life events and stress (Epel et  
81 al., 2004; Puterman et al., 2014), and health behaviours (Puterman et al., 2014). All of these factors  
82 are episodic or changeable over time, so it could be that individuals' telomeres change at different  
83 rates—or even in different directions—in different years, without this being in any sense due to  
84 measurement or sampling error. Two recent papers have specifically suggested that telomeres  
85 shorten in a dynamic or oscillatory way, in which one year's true attrition is not predictable from the  
86 previous year's (Svenson et al., 2011; Huzen et al., 2014).

87 If there are year-to-year changes in individuals' rate of true shortening, then the linear regressions  
88 for each individual would not fit perfectly, even if telomere length could be measured with no error  
89 at all. The denominator of the F-ratio statistic proposed by SSN thus actually sums together two  
90 components: the variability over time of the *true* rate of telomere change within individuals, plus the  
91 measurement and sampling error. This means that, where there is any variability in individual  
92 shortening rates over time, the denominator of the test will be larger than it should be for the  
93 purposes required of it, the F-ratio will consequently be too small, and the test will potentially  
94 produce a high rate of type-II errors.

95 It is common for statistical tests to rely in their derivation on assumptions that are not exactly met in  
96 real phenomena, but yet the tests still turn out to be useful. Thus, the question is, how large would  
97 departures from constant rates of true shortening have to be to cause substantial problems of type-  
98 II error for the proposed test? This question interacts with the extent of measurement error. SSN  
99 show in simulations that, other things being equal, increasing the extent of measurement error  
100 reduces the power of the proposed test. This may be particularly true if the constant-true-rate  
101 assumption is also violated. Here, we simulated large longitudinal telomere datasets, systematically  
102 varying the extent of measurement error (none, small, large), and the assumed underlying true  
103 dynamics (constant true rate for individuals, no individual consistency in the true rate, moderate  
104 individual consistency in the true rate). To maximise the relevance to empirical applications of the  
105 test, we used reported values from the human telomere literature in constructing our simulations.  
106 Our objective was to estimate the likely power of the test to detect true lengthening when true  
107 lengthening is in fact present. We kept the sample size in our simulated datasets at 10,000  
108 individuals throughout, so as to be able to understand the power of the test even as sample size  
109 becomes very large.

## 110 **Methods**

111 Our simulations are based on a computational model described formally in the Appendix, and  
112 explored more fully in Bateson and Nettle (2017). The R code to generate all the results that follow is  
113 available as Supporting Online Material. The model assumes that telomere length is measured every  
114 year, and it can be iterated to give as many years of data as required.

115 In the first stage of the model, the true telomere lengths at each time point for  $n = 10,000$   
116 individuals are generated. The baseline telomere lengths are drawn from a normal distribution with  
117 mean 7,000 base pairs (bp) and standard deviation 700 bp. The second year's telomere lengths are  
118 generated by subtracting a normally distributed random amount with mean 30 bp and standard  
119 deviation 50 bp. This means that although the average telomere length shortens from baseline to  
120 the second year, some individuals truly lengthen. For example, an individual whose attrition is one  
121 standard deviation from the mean in the positive direction actually experiences lengthening of 20  
122 bp. The values for the means and standard deviations of baseline telomere length and attrition are

123 representative of the empirical human literature (Aviv et al., 2009; Chen et al., 2011; Kark et al.,  
124 2012; Steenstrup et al., 2013a)

125 In each subsequent year, attrition is repeated, again with a mean of 30 bp and standard deviation of  
126 50 bp. Attrition in each successive year can be made to be correlated with attrition in the previous  
127 year (each new year's attrition values are generated from the last using equation 5 of the Appendix).  
128 The level of autocorrelation is controlled by a parameter  $r$ . In the case where  $r = 1$ , the amount of  
129 telomere change, whether shortening or elongation, is constant from year to year. Thus, the  $r = 1$   
130 case captures the assumption made by SSN in the derivation of their statistic. Where  $r = 0$ , attrition  
131 is completely independent from year to year; an individual with relative fast attrition in one year is  
132 just as likely as any other to have slow attrition the next year. Here, we investigate three values of  $r$ :  
133  $r = 1$ , where SSN's constant-rate assumption holds;  $r = 0$ , where there is no individual consistency at  
134 all in the rate of telomere change; and  $r = 0.5$ , where there is partial but not complete individual  
135 consistency in the rate of change over time, and so SSN's assumption may be useful as an  
136 approximation.

137 In a second stage of the model, measurement error can be introduced by assuming that measured  
138 telomere length at each time point is an independently generated random sample from a normal  
139 distribution with the mean equal to the true telomere length. For the standard deviation of this  
140 error distribution, we investigated three values: 0, i.e. no measurement error; 140 bp; and 560 bp.  
141 The latter two values were chosen to be high and low in the range of recent estimates of the  
142 magnitude of technical variation in telomere measurement (98 - 665 bp; Martin-Ruiz et al., 2014;  
143 Bateson & Nettle, 2017). Note that measurement error is implemented as a fixed standard deviation  
144 around the true length, and not as a coefficient of variation as in our previous paper (Bateson &  
145 Nettle, 2017). Recent evidence suggests that the assumption implicit in the construction of a  
146 coefficient of variation (that measurement error is proportional to the telomere length measured)  
147 may not hold for telomere measurement, at least when done by qPCR (Verhulst et al., 2015).

148 We used the model to generate one hundred datasets at each combination of: two to eleven years  
149 of follow-up; and autocorrelations of  $r = 1$ ,  $r = 0.5$  and  $r = 0$ . All of these datasets contained true  
150 telomere lengthening, though the proportion of true lengtheners varied as functions of both length  
151 of follow-up and autocorrelation (Bateson & Nettle, 2017). For each dataset, we calculated the F-  
152 ratio statistic using the code provided by SSN. We investigated, for each combination of years of  
153 follow-up and  $r$ : first, how many true lengtheners there were in each dataset; and second, how many  
154 of the possible 100 F-ratio tests were significant by the conventional criterion of  $p < 0.05$ .

## 155 Results

156 In figure 1, the points and dashed lines show the proportion of times the F-ratio test proposed by  
157 SSN produced a significant result, as a function of the number of years of follow-up, and broken  
158 down by the autocorrelation of individuals' annual true telomere attritions ( $r = 0$ ,  $r = 0.5$  or  $r = 1$ ),  
159 and the level of assumed measurement error (SD = 0, SD = 140, SD = 560). The mean proportion of  
160 individuals whose telomeres truly lengthen varies as a function of  $r$  and the length of follow-up; it is  
161 shown as the solid line in each panel of figure 1. The grey area shading corresponds to regions where  
162 more than 5% of individuals showed true telomere lengthening, and so it would be desirable for the  
163 proposed test to return a significant result.

164

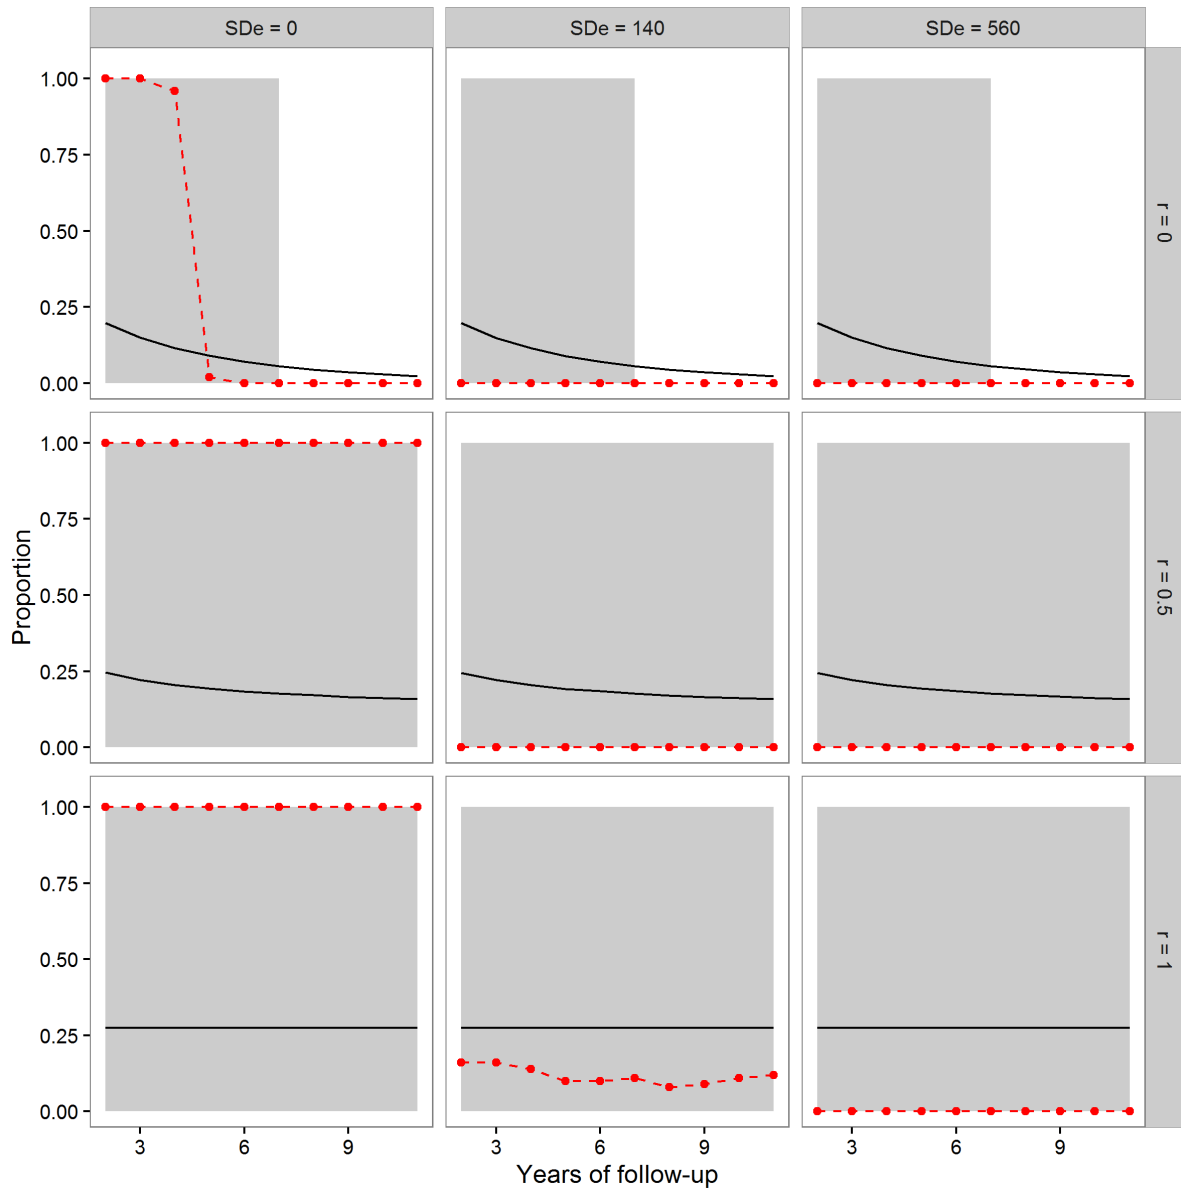

165

166

167

168

169

170

171

172

173

174

175

176

177

178

179

180

Figure 1. The mean proportion of individuals exhibiting true telomere lengthening (solid line), and the proportion of times the F-ratio test proposed by Simons, Stulp and Nakagawa (2014) returned a significant result (points and dashed lines), for different numbers of years of follow-up, split by level of measurement error (0, 140 or 560 bp) and values of the autocorrelation parameter  $r$  ( $r = 0$ ,  $r = 0.5$ ,  $r = 1$ ). The first point is after two years of follow-up, since this is the earliest point where the test statistic can be calculated (baseline plus two follow-up measurements). The grey area shading covers regions where the proportion of the population exhibiting true lengthening is greater than 5%. When  $r = 1$ , individuals have a constant rate of change over the whole time period. When  $r = 0$ , an individual's telomere change in one time period is independent of their change in the previous period.  $r = 0.5$  indicates moderate individual consistency in the rate of change. At each combination of  $r$ , measurement error, and years of follow-up, 100 datasets each of 10,000 individuals were simulated.

181 We first consider the case where there was no measurement error (left column of figure 1). Where  
182 SSN's assumption of a constant true rate was met ( $r = 1$ ; bottom panel), the test successfully  
183 returned a significant result for every dataset using these large samples. The same was also true  
184 when the constant-true-rate assumption was not exactly met, but there was moderate temporal  
185 consistency in the true rate ( $r = 0.5$ ; middle panel of left column). However, when there was no  
186 individual consistency in the true rate of attrition ( $r = 0$ ; top panel of left column), the proposed test  
187 systematically returned type-II errors for follow-up periods of 5 years or more, even with no  
188 measurement error.

189 The second column of figure 1 shows the case of measurement error equal to a standard deviation  
190 of 140 bp. Here, the test had low power (under 0.25) when SSN's assumption of a constant true rate  
191 was met ( $r = 1$ ; bottom panel), even in these samples of 10,000 individuals. Where the assumption  
192 was not met ( $r = 0.5$  and  $r = 0$ ), the test always returned a non-significant result. Finally, we  
193 considered measurement error equal to a standard deviation of 560 bp. Here, the test always  
194 returned a non-significant result, although substantial fractions of the population exhibited true  
195 lengthening.

## 196 Discussion

197 We considered the performance of the F-ratio test proposed by SSN on simulated longitudinal  
198 datasets, under different scenarios for the nature of the true telomere dynamics and the magnitude  
199 of measurement error, where there was a non-zero and known proportion of true telomere  
200 lengtheners, and the sample size was very large. Ideally the test should have been significant in all or  
201 the vast majority of cases, particularly those where the proportion of true lengtheners was  
202 substantial. We found that, whilst the test correctly detected lengthening under two of our nine  
203 scenarios, for the remainder, it either always or usually returned a type-II error. That is, it led to the  
204 acceptance of a null hypothesis (no true lengthening) that should have been rejected.

205 Our first conclusion is that measurement error at the levels that have been reported in the human  
206 literature reduces the power of the proposed test to a low level. Under our smaller and larger non-  
207 zero measurement-error scenarios, the test returned a non-significant result almost all of the time.  
208 This was despite our using samples (10,000 individuals) that are at the upper end of the size range  
209 studied in practice by empiricists. The finding that increased measurement error reduces the test's  
210 power accords with the power simulations presented by SSN. They found that power was good as  
211 long as the standard deviation of true attrition was larger than the standard deviation due to  
212 measurement error (see SSN, figure 1). We agree, but would argue that the standard deviation of  
213 attrition is generally much smaller than the standard deviation due to measurement error in  
214 practice. For humans, the best empirical estimates are that the standard deviation of annual true  
215 telomere attrition is of the order 14 - 53 bp/year for humans (Aviv et al., 2009; Chen et al., 2011;  
216 Kark et al., 2012; Steenstrup et al., 2013a), whilst the standard deviation due to measurement error  
217 is of the order of 98 - 665 bp (Martin-Ruiz et al., 2014; Bateson & Nettle, 2017). Technical precision  
218 may vary from technique to technique (Verhulst et al., 2015, 2016), and running extra technical  
219 replicates can reduce the magnitude of measurement error (Verhulst et al., 2015; Eisenberg, 2016).  
220 Nonetheless, researchers using the test should be mindful that if the magnitude of the measurement  
221 error in their data is the same as or larger than the magnitude of the variation in true telomere  
222 attrition, the test will be prone to return type-II errors.

223 Our second conclusion concerns SSN's assumption that the true rate of telomere attrition is  
224 perfectly consistent within individuals over time. Violations of this assumption also reduce the  
225 power of the test. In particular, the test never once returned a significant result, in 4000 attempts,

226 where the constant-true-rate assumption was not true and there was any measurement error. Even  
227 with no measurement error, the power of the test was very low at long follow-ups under the  
228 scenario of no individual consistency in true attrition from year to year. These type-II errors are  
229 understandable. When the true rate of attrition varies within individuals, the denominator of the F-  
230 ratio is systematically too large, because it adds the variability in the annual rate of true attrition to  
231 the calculation of the error variation. Thus, the F-ratio statistic is almost always less than one, and a  
232 significant result can very rarely be generated. Thus, the SSN approach to detecting telomere  
233 elongation would be problematic if it turned out that the true rate of attrition varies substantially  
234 from year to year.

235 We do not currently know to what extent individuals' true telomere losses are consistent from year  
236 to year. Bateson and Nettle (2017) used observed patterns of apparent lengthening in data sets with  
237 different durations of follow-up to estimate that individual consistency in the rate of attrition is low.  
238 Two recent empirical studies have suggested that telomere change tends to oscillate, with periods of  
239 rapid attrition followed by periods of elongation (Svenson et al., 2011; Huzen et al., 2014). The issue  
240 is far from settled, though, and there have not been systematic attempts to distinguish fluctuation in  
241 true dynamics from measurement error in longitudinal data. However, given the uncertainty about  
242 the extent of individual consistency, it does seem somewhat restrictive to base a test on the  
243 assumption that the individual consistency is perfect. Indeed, what attracts researchers to telomere  
244 length as a biomarker is precisely that the rate of attrition seems to vary in relation to life events  
245 (Epel et al., 2004; Shalev, 2012; Asghar et al., 2015; Bateson, 2016). Thus, the interpretation of a  
246 non-significant result from the SSN test, even in a very large sample, should be cautious.

247 Although we argue that the proposed test is likely to suffer from low power, we do not have a simple  
248 correction or an alternative test to propose. This is because basic questions about the nature of  
249 telomere dynamics over time remain unanswered, and answers to these questions are required in  
250 order to ground any test in appropriate assumptions. The most relevant question in the current  
251 context is whether there is individual consistency in the rate of telomere shortening; and if, so,  
252 whether this arises from consistent environmental influences, developmental factors, or genetic  
253 variation. Telomere dynamics are likely to vary between species, and so different models of how  
254 telomeres change may be appropriate to different systems. Our simulations with moderate but  
255 imperfect individual consistency generated the consistency through an autoregressive process of  
256 order one; this is not the only possible method, and may not be the most appropriate. Thus, we  
257 would appeal to the field to conduct large longitudinal studies with more than two measurement  
258 time points. As well as shedding light on the appropriateness of SSN's true-constant-rate  
259 assumption, this would help us to build better process models of how telomeres change, and hence  
260 to derive robust statistical models against which empirical data can be compared.

261

## 262 **Appendix**

263 For each individual in each dataset, baseline telomere length in base pairs is generated by:

$$264 \quad \text{length}_b \sim N(7000, 700) \quad (1)$$

265 Length at the first follow-up year is then generated by:

$$266 \quad \text{length}_1 = \text{length}_b - \text{attrition}_1 \quad (2)$$

$$267 \quad \text{attrition}_1 \sim N(30, 50) \quad (3)$$

268 For all subsequent years:

$$269 \quad \text{length}_{y+1} = \text{length}_y - \text{attrition}_{y+1} \quad (4)$$

$$270 \quad \text{attrition}_{y+1} = r \cdot \text{attrition}_y + \sqrt{(1-r^2)} N\left(\frac{(1-r)}{\sqrt{(1-r^2)}} 30, 50\right) \quad (5)$$

271 Equation (5) generates attrition values that have the required level of autocorrelation  $r$ , whilst  
272 maintaining a mean attrition of 30 bp and a standard deviation of attrition of 50 bp (for proof see  
273 Bateson & Nettle, 2017).

274 Finally, measurement error is added to all telomere lengths using:

$$275 \quad \text{measured}_y \sim N(\text{length}_y, SD_e) \quad (6)$$

276 Here,  $SD_e$  represents the magnitude of measurement error, taken as either 0 bp, 140 bp or 560 bp,  
277 as specified.

278

## 279 References

- 280 Asghar M., Hasselquist D., Zehtindjiev P., Westerdahl H., Bensch S. 2015. Hidden costs of infection:  
281 Chronic malaria accelerates telomere degradation and senescence in wild birds. *Science* 347:9–  
282 12.
- 283 Aviv A., Chen W., Gardner JP., Kimura M., Brimacombe M., Cao X., Srinivasan SR., Berenson GS. 2009.  
284 Leukocyte telomere dynamics: Longitudinal findings among young adults in the Bogalusa Heart  
285 Study. *American Journal of Epidemiology* 169:323–329.
- 286 Bateson M. 2016. Cumulative stress in research animals: Telomere attrition as a biomarker in a  
287 welfare context? *BioEssays* 38:201–12.
- 288 Bateson M., Nettle D. 2017. The telomere lengthening conundrum - it could be biology. *Aging Cell*  
289 16:312–9.
- 290 Boonekamp JJ., Simons MJP., Hemerik L., Verhulst S. 2013. Telomere length behaves as biomarker of  
291 somatic redundancy rather than biological age. *Aging Cell* 12:330–2.
- 292 Chen W., Kimura M., Kim S., Cao X., Srinivasan SR., Berenson GS., Kark JD., Aviv A. 2011. Longitudinal  
293 versus cross-sectional evaluations of leukocyte telomere length dynamics: Age-dependent  
294 telomere shortening is the rule. *Journals of Gerontology - Series A Biological Sciences and*  
295 *Medical Sciences* 66 A:312–319.
- 296 Eisenberg DTA. 2016. Telomere Length Measurement Validity: The Coefficient of Variation (CV) is  
297 invalid and cannot be used to compare qPCR and Southern Blot telomere length measurement  
298 techniques. *International Journal of Epidemiology*:1295–8.
- 299 Epel ES., Blackburn EH., Lin J., Dhabhar FS., Adler NE., Morrow JD., Cawthon RM. 2004. Accelerated  
300 telomere shortening in response to life stress. *Proceedings of the National Academy of Sciences*  
301 *of the United States of America* 101:17312–5.
- 302 Hau M., Greives TJ., Haussmann MF., Matlack C., Costantini D., Quetting M., Adelman JS., Partecke J.  
303 2015. Repeated stressors in adulthood increase the rate of biological ageing. *Frontiers in*  
304 *Zoology* 12:1–10.
- 305 Heidinger BJ., Blount JD., Boner W., Griffiths K., Metcalfe NB., Monaghan P. 2012. Telomere length in  
306 early life predicts lifespan. *Proceedings of the National Academy of Sciences of the United*



- 307 *States of America* 109:1743–8.
- 308 Huzen J., Wong LSM., Veldhuisen DJ Van., Samani NJ., Zwinderman AH., Codd V., Cawthon RM.,  
309 Benus GFJD., Horst ICC Van Der., Navis G., Bakker SJL., Gansevoort RT., Jong PE De., Hillege HL.,  
310 Gilst WH Van., Boer RA De., Harst P Van Der. 2014. Telomere length loss due to smoking and  
311 metabolic traits. *Journal of Internal Medicine* 275:155–163.
- 312 Kark J., Goldberger N., Kimura M., Sinnreich R., Aviv A. 2012. Energy intake and leukocyte telomere  
313 length in young adults. *The American Journal of Clinical Nutrition*:479–87.
- 314 Martin-Ruiz CM., Baird D., Roger L., Boukamp P., Kronic D., Cawthon R., Dokter MM., van der Harst  
315 P., Bekaert S., de Meyer T., Roos G., Svenson U., Codd V., Samani NJ., McGlynn L., Shiels PG.,  
316 Pooley KA., Dunning AM., Cooper R., Wong A., Kingston A., von Zglinicki T. 2014.  
317 Reproducibility of telomere length assessment: an international collaborative study.  
318 *International Journal of Epidemiology*:1–11.
- 319 Müezzinler A., Karina A., Brenner H. 2013. A systematic review of leukocyte telomere length and age  
320 in adults. *Ageing Research Reviews* 12:509–519.
- 321 Puterman E., Lin J., Krauss J., Blackburn EH., Epel ES. 2014. Determinants of telomere attrition over 1  
322 year in healthy older women: stress and health behaviors matter. *Molecular Psychiatry* 20:529–  
323 35.
- 324 Rode L., Nordestgaard BG., Bojesen SE. 2015. Peripheral blood leukocyte telomere length and  
325 mortality among 64,637 individuals from the general population. *Journal of the National Cancer*  
326 *Institute* 107:djv074.
- 327 Shalev I. 2012. Early life stress and telomere length: Investigating the connection and possible  
328 mechanisms: A critical survey of the evidence base, research methodology and basic biology.  
329 *BioEssays* 34:943–52.
- 330 Simons MJP., Stulp G., Nakagawa S. 2014. A statistical approach to distinguish telomere elongation  
331 from error in longitudinal datasets. *Biogerontology* 15:99–103.
- 332 Steenstrup T., Hjelmborg JVB., Mortensen LH., Kimura M., Christensen K., Aviv A. 2013a. Leukocyte  
333 telomere dynamics in the elderly. *European Journal of Epidemiology* 28:181–187.
- 334 Steenstrup T., Hjelmborg JVB., Kark JD., Christensen K., Aviv A. 2013b. The telomere lengthening  
335 conundrum--artifact or biology? *Nucleic Acids Research* 41:e131.
- 336 Svenson U., Nordfjall K., Baird D., Roger L., Osterman P., Hellenius M-L., Roos G. 2011. Blood cell  
337 telomere length is a dynamic feature. *PLoS one* 6:e21485.
- 338 Verhulst S., Susser E., Factor-Litvak PR., Simons MJP., Benetos A., Steenstrup T., Kark JD., Aviv A.  
339 2015. Commentary: The reliability of telomere length measurements. *International Journal of*  
340 *Epidemiology* 44:1683–1686.
- 341 Verhulst S., Susser E., Factor-litvak PR., Simons MJP., Benetos A., Steenstrup T., Kark JD., Aviv A.  
342 2016. Response to: Reliability and validity of telomere length measurements. *International*  
343 *Journal of Epidemiology* 45:1298–1301.
- 344
